# Supplementary material
Source: Research Square preprint supplement (doi:10.21203/rs.3.rs-9611899/v1)
Supplement: Supplementary file 1 [file cb906c31fcc1d67348a5f5c7.docx]

# ================================
# 1. IMPORT LIBRARIES
# ================================
import wbdata
import pandas as pd
import numpy as np
import datetime
import matplotlib.pyplot as plt

import xgboost as xgb
import tensorflow as tf
from tensorflow.keras.models import Sequential
from tensorflow.keras.layers import LSTM, Dense

# ================================
# 2. DATA DOWNLOAD (FIXED wbdata API)
# ================================
indicators = {
 "NY.GDP.MKTP.KD.ZG": "gdp_growth", # proxy for profits
 "SL.UEM.TOTL.ZS": "unemployment", # institutional pressure
 "GC.TAX.TOTL.GD.ZS": "tax_rate", # fiscal regime g(t)
 "NE.CON.PRVT.ZS": "consumption_share" # wage proxy
}

country = "MAR"

data = wbdata.get_dataframe(
 indicators,
 country=country,
 date=(datetime.datetime(2000, 1, 1), datetime.datetime(2022, 1, 1))
)

data = data.reset_index().sort_values("date")

# ================================
# 3. ECONOMIC VARIABLES (KALECKIAN STRUCTURE)
# ================================
data["wage"] = data["consumption_share"]
data["profits"] = data["gdp_growth"]

# institutional variable g(t)
data["g_t"] = data["tax_rate"] / (1 + data["unemployment"])

# forward-looking expectation (reduced-form)
data["wage_expectation"] = data["wage"].shift(-1)

data = data.dropna()

# ================================
# 4. FEATURES AND TARGET
# ================================
X = data[["wage_expectation", "profits", "g_t"]].values
y = data["wage"].values

# ================================
# 5. SCALE DATA (CRITICAL FIX)
# ================================
from sklearn.preprocessing import StandardScaler

scaler_X = StandardScaler()
scaler_y = StandardScaler()

X_scaled = scaler_X.fit_transform(X)
y_scaled = scaler_y.fit_transform(y.reshape(-1, 1)).flatten()

# ================================
# 6. TRAIN / TEST SPLIT
# ================================
split = int(len(X_scaled) * 0.8)

X_train, X_test = X_scaled[:split], X_scaled[split:]
y_train, y_test = y_scaled[:split], y_scaled[split:]

# ================================
# 7. XGBOOST (GBM - NONLINEAR CORE MODEL)
# ================================
dtrain = xgb.DMatrix(X_train, label=y_train)
dtest = xgb.DMatrix(X_test, label=y_test)

params = {
 "objective": "reg:squarederror",
 "max_depth": 4,
 "eta": 0.05,
 "subsample": 0.8
}

gbm_model = xgb.train(params, dtrain, num_boost_round=200)
y_pred_gbm = gbm_model.predict(dtest)

# ================================
# 8. REALISTIC NONLINEAR ENSEMBLE (REPLACES BUGGY FOREST)
# ================================
from sklearn.ensemble import RandomForestRegressor

rf = RandomForestRegressor(
 n_estimators=200,
 max_depth=5,
 random_state=42
)

rf.fit(X_train, y_train)
y_pred_rf = rf.predict(X_test)

# ================================
# 9. LSTM (FIXED SEQUENCE MODEL)
# ================================
X_lstm = np.reshape(X_scaled, (X_scaled.shape[0], 1, X_scaled.shape[1]))

X_train_lstm = X_lstm[:split]
X_test_lstm = X_lstm[split:]

model = Sequential()
model.add(LSTM(64, activation='tanh', input_shape=(1, X_scaled.shape[1])))
model.add(Dense(1))

model.compile(optimizer='adam', loss='mse')
model.fit(X_train_lstm, y_train, epochs=80, verbose=0)

y_pred_lstm = model.predict(X_test_lstm).flatten()

# ================================
# 10. INVERSE SCALE (CRITICAL FIX)
# ================================
y_test_real = scaler_y.inverse_transform(y_test.reshape(-1,1)).flatten()

y_pred_gbm_real = scaler_y.inverse_transform(y_pred_gbm.reshape(-1,1)).flatten()
y_pred_rf_real = scaler_y.inverse_transform(y_pred_rf.reshape(-1,1)).flatten()
y_pred_lstm_real = scaler_y.inverse_transform(y_pred_lstm.reshape(-1,1)).flatten()

# ================================
# 11. PERFORMANCE METRICS
# ================================
def rmse(y_true, y_pred):
 return np.sqrt(np.mean((y_true - y_pred) ** 2))

def mae(y_true, y_pred):
 return np.mean(np.abs(y_true - y_pred))

results = pd.DataFrame({
 "Model": ["XGBoost (GBM)", "Random Forest", "LSTM"],
 "RMSE": [
 rmse(y_test_real, y_pred_gbm_real),
 rmse(y_test_real, y_pred_rf_real),
 rmse(y_test_real, y_pred_lstm_real)
 ],
 "MAE": [
 mae(y_test_real, y_pred_gbm_real),
 mae(y_test_real, y_pred_rf_real),
 mae(y_test_real, y_pred_lstm_real)
 ]
})

print("\n=== MODEL PERFORMANCE ===")
print(results)

# ================================
# 12. SUMMARY STATISTICS
# ================================
stats = pd.DataFrame({
 "Mean": np.mean(X, axis=0),
 "Std": np.std(X, axis=0),
 "Min": np.min(X, axis=0),
 "Max": np.max(X, axis=0)
}, index=["Expectations", "Profits", "g(t)"])

print("\n=== SUMMARY STATISTICS ===")
print(stats)

# ================================
# 13. PLOT RESULTS (FIXED)
# ================================
plt.figure(figsize=(10,5))
plt.plot(data["date"][split:], y_test_real, label="Actual")
plt.plot(data["date"][split:], y_pred_gbm_real, label="XGBoost")
plt.plot(data["date"][split:], y_pred_rf_real, label="Random Forest")
plt.plot(data["date"][split:], y_pred_lstm_real, label="LSTM")

plt.legend()
plt.title("Kaleckian Wage Dynamics (Corrected ML Estimation)")
plt.xticks(rotation=45)
plt.tight_layout()
plt.show()

# ================================
# 14. FEATURE IMPORTANCE
# ================================
importance = gbm_model.get_score(importance_type='weight')

print("\n=== FEATURE IMPORTANCE (XGBOOST) ===")
print(importance)
